# Supplementary material
Source: publisher site journal article supplement (https://www.dovepress.com/article/529249)
Supplement: Supplementary file 1 [file 529249%20Revised%20supplementary%20materials.docx]

Supplementary Material

# Supplementary Figures

**Supplement Figure 1**


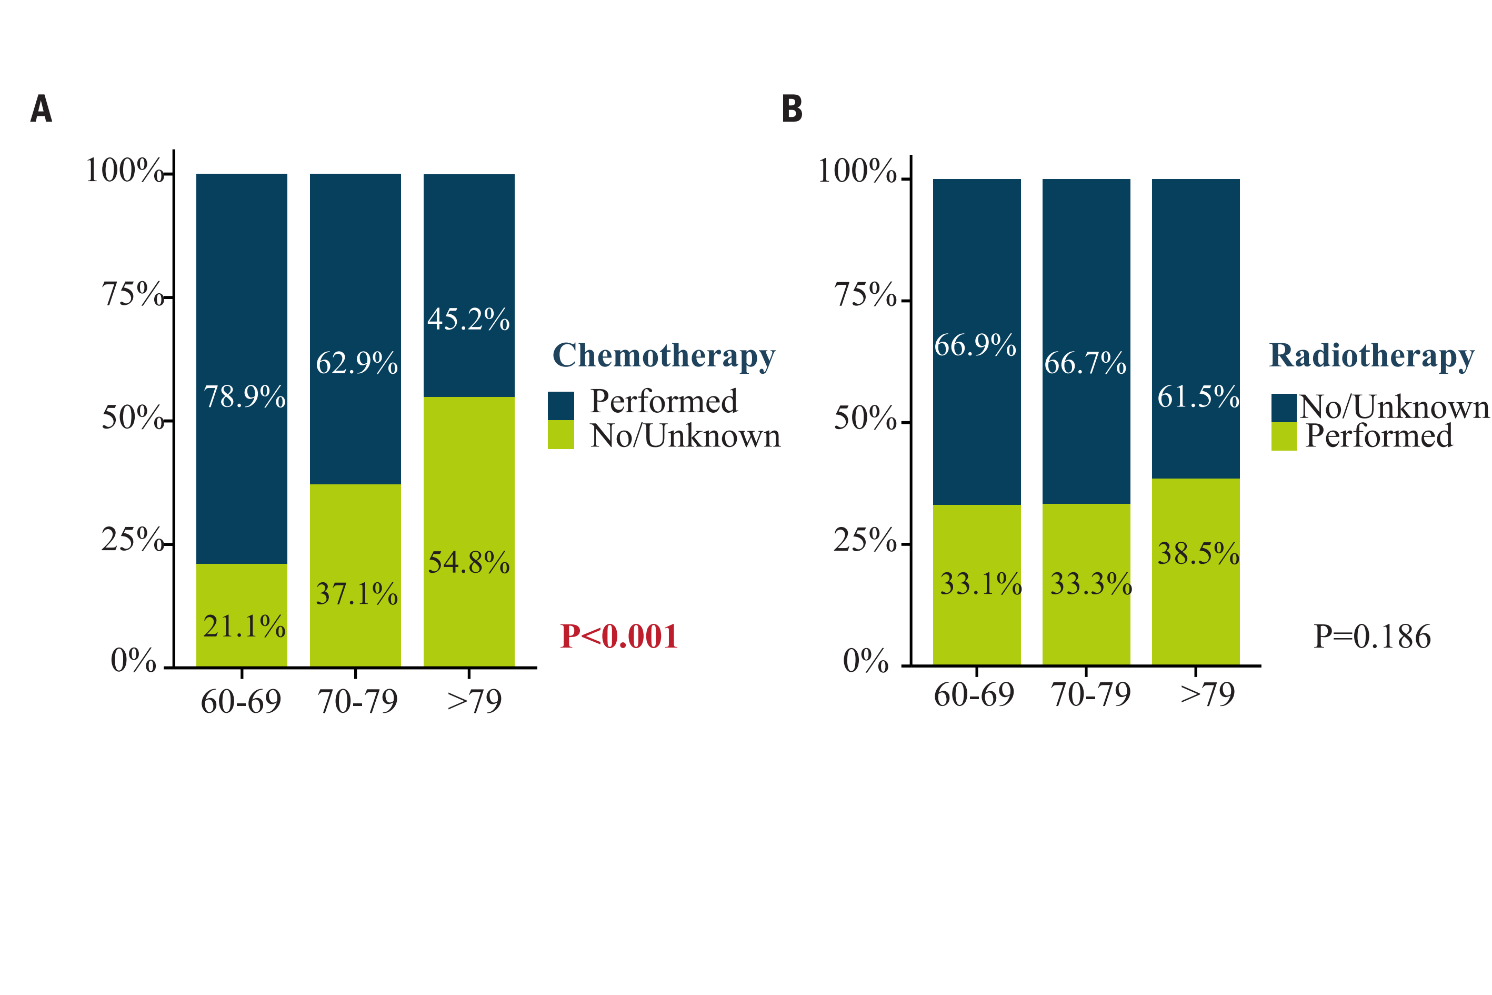


**Supplement Figure 1** The difference in the proportion of elderly patients (≥60 years old) with primary central nervous system lymphoma between different age (69-69,70-79,>80) and different treatment: (A) Chemotherapy (B)Radiotherapy

**Supplement Figure 2**

**
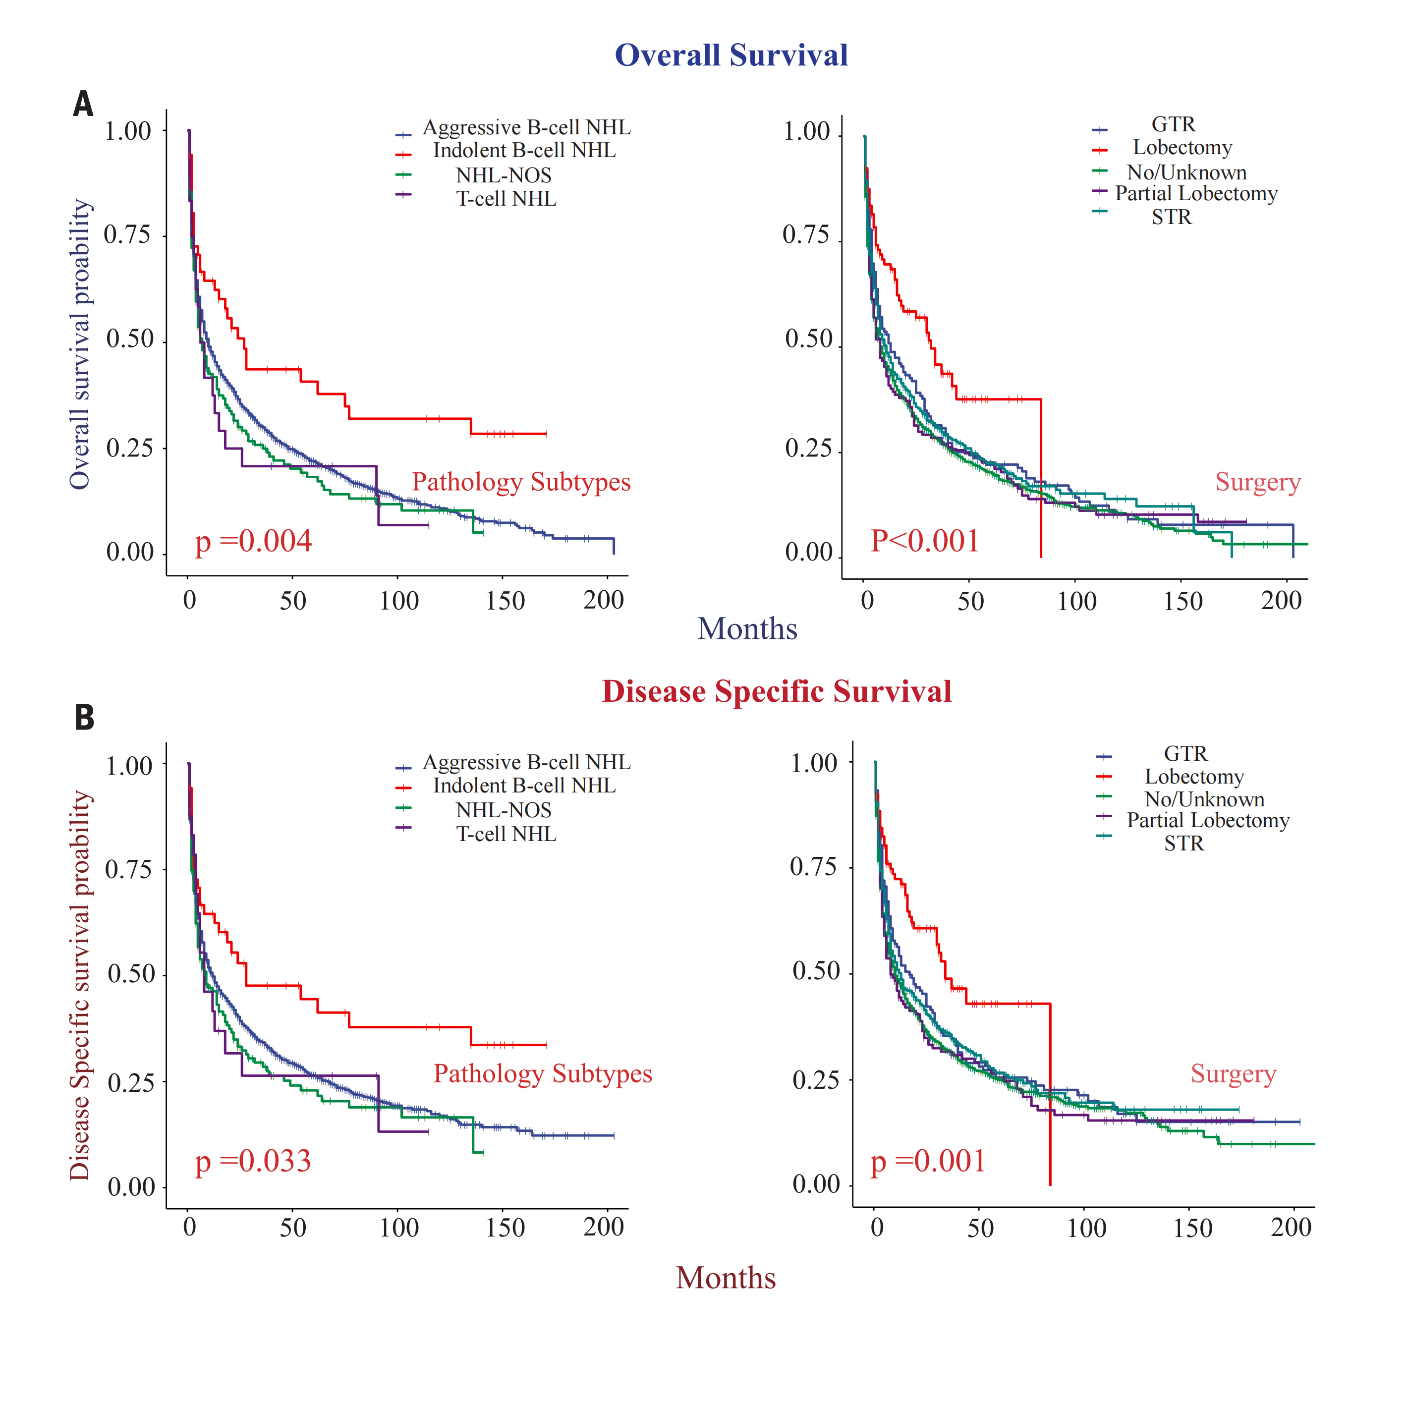
**

**Supplement Figure 2** Survival analysis of elderly (≥60 years) patients with primary central nervous system lymphoma by pathology subtypes and operation modes. (A) Overall survival (OS) and (B) Disease-specific survival (DSS).

**Supplement Figure 3**

**
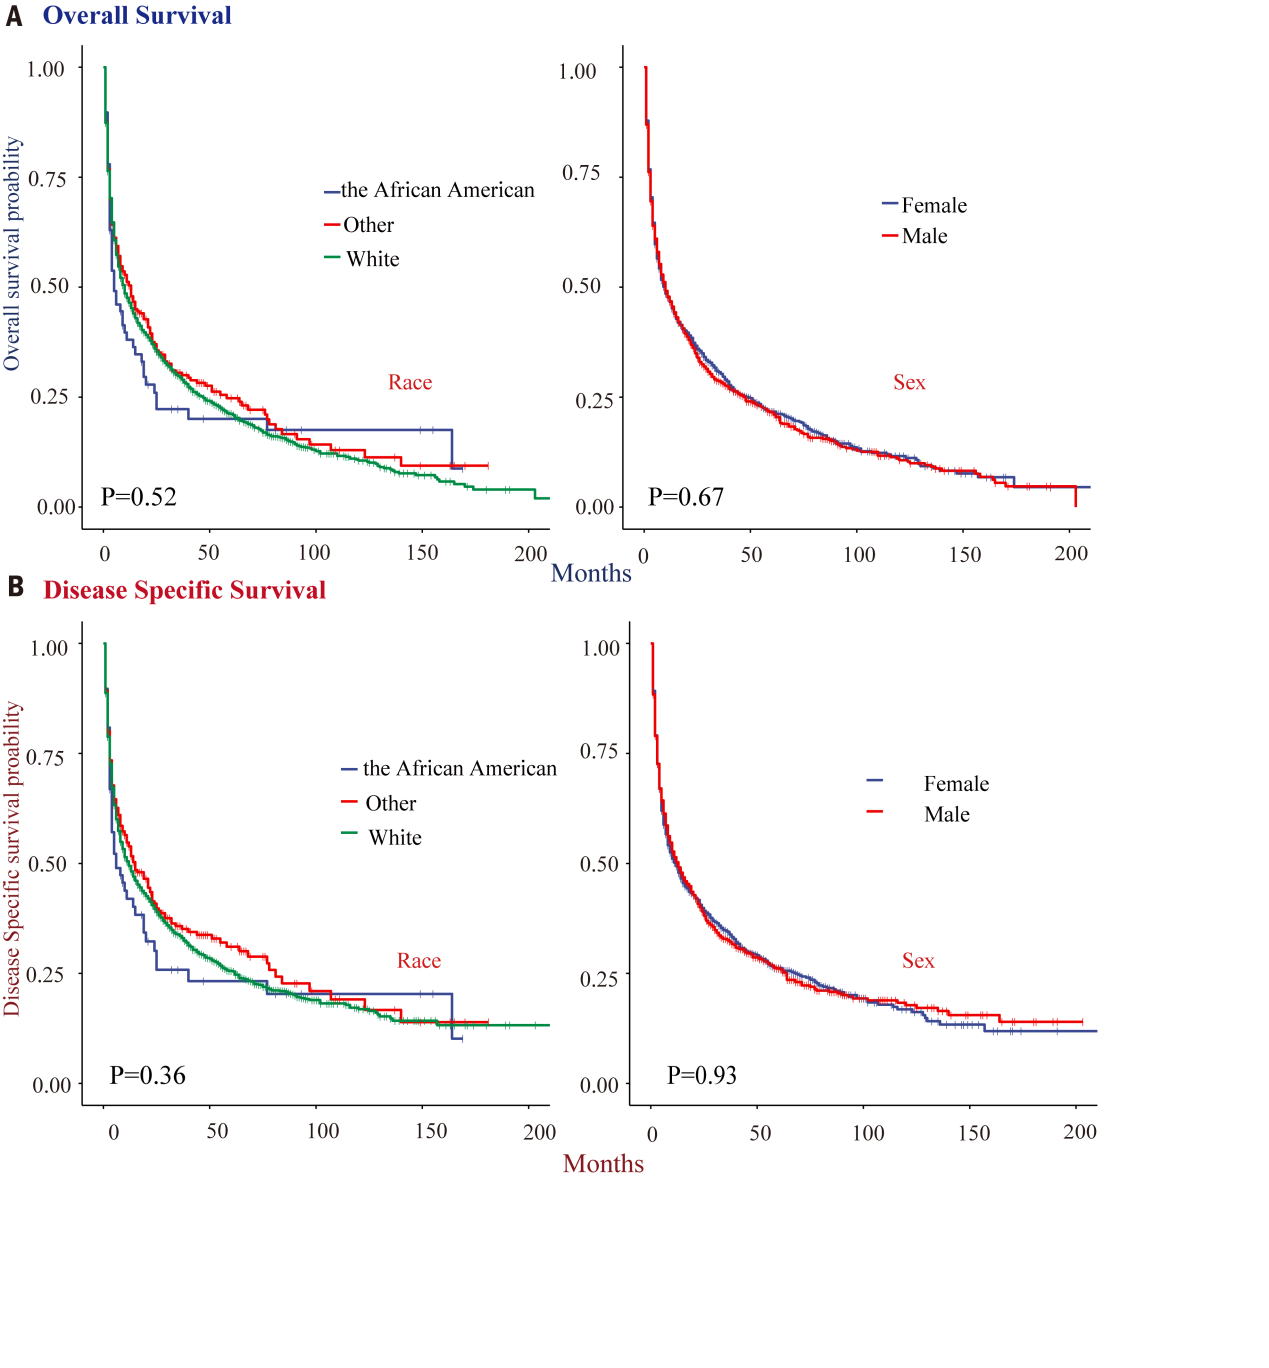
**

**Supplement Figure 3** Survival analysis of elderly (≥60 years) patients with primary central nervous system lymphoma by epidemiological stratification: race and sex. (A) Overall survival (OS) and (B) Disease-specific survival (DSS).

**
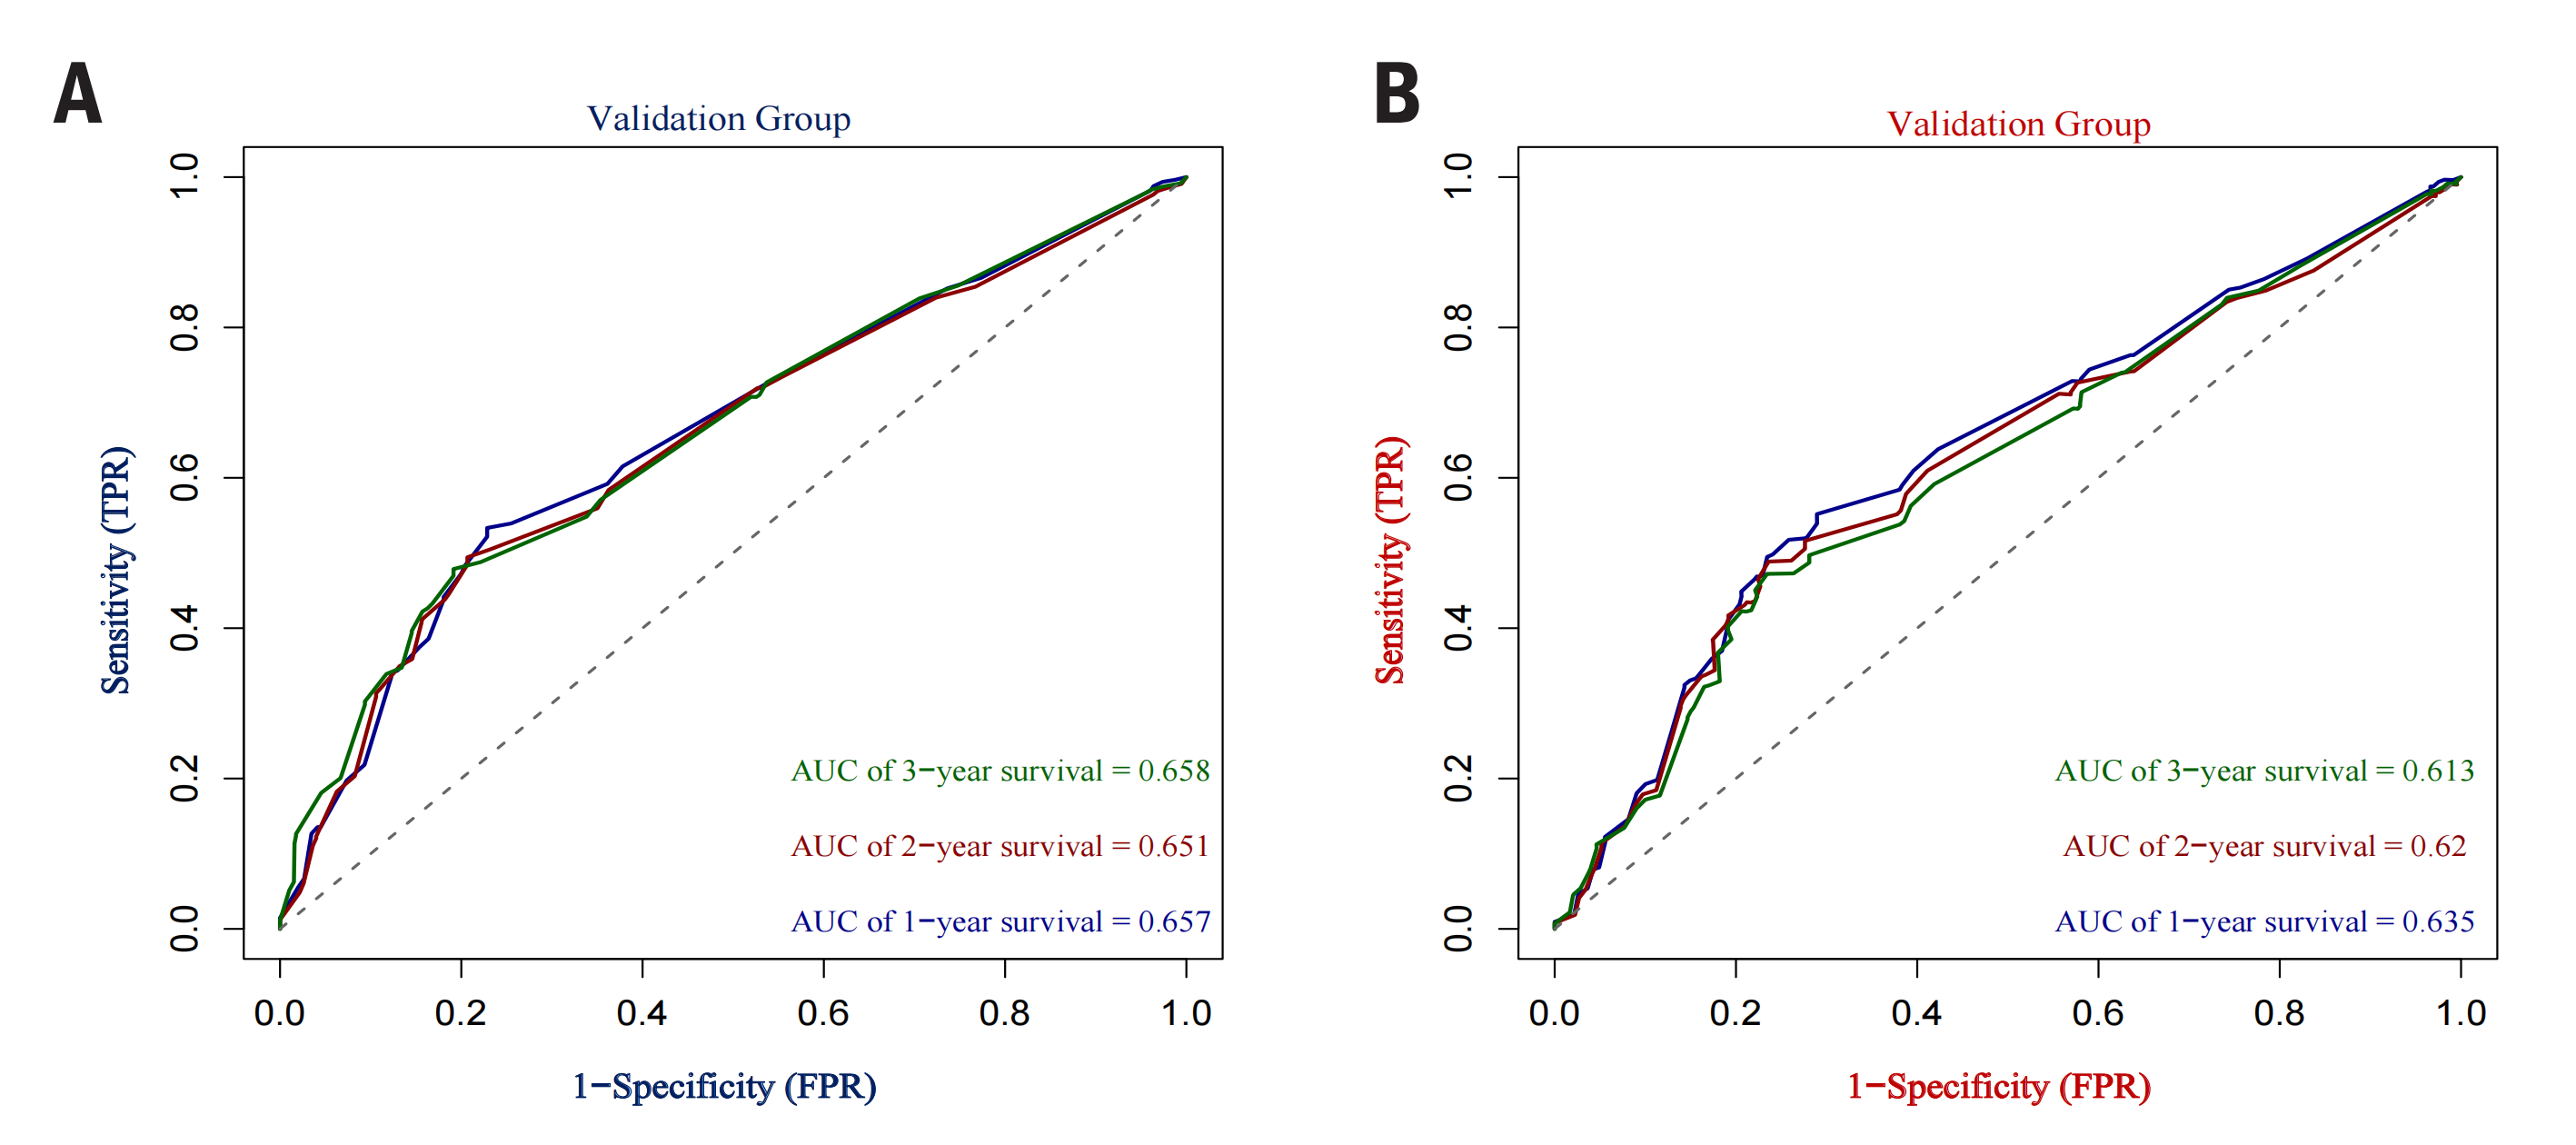
Supplement Figure 4**

**Supplement Figure 4** The ROC curve of the internal validation set for the prediction of 1-,2-and 3-year overall survival (OS) and disease-specific survival (DSS) prognostic models of primary central nervous system lymphoma in the elderly (≥60 years). (A) Overall survival (OS) and (B) Disease-specific survival (DSS).

# Supplement Table

| **Factor** | **1998-2007** | **2008-2016** | **χ2** | **P** |
| --- | --- | --- | --- | --- |
| **(N=916)** | **(N=1230)** |
| **Surgery** |  |  | 2.061 | 0.151 |
| Performed | 388 (42.4%) | 482 (39.2%) |  |  |
| No/unknown | 528 (57.6%) | 748 (60.8%) |  |  |
| **Chemotherapy** |  |  | 75.979 | P<0.001 |
| Performed | 524 (57.2%) | 924 (75.1%) |  |  |
| No/unknown | 392 (42.8%) | 306 (24.9%) |  |  |
| **Radiation** |  |  | 113.87 | P<0.001 |
| Performed | 427 (46.6%) | 301 (24.5%) |  |  |
| No/unknown | 489 (53.4%) | 929 (75.5%) |  |  |

**Supplement Table 1** Comparisons between different treatment options for elderly patients with primary central nervous system lymphoma diagnosed in an early year (between 1998 and 2007) and diagnosed in recent years (between 2008 and 2016).

| **Factor** | **Training** | **Validation** | **χ2** | **P** |
| --- | --- | --- | --- | --- |
| **(N=1502)** | **(N=644)** |
| **Age** |  |  | 3.432 | 0.18 |
| 60-69 | 690 (45.9%) | 269 (41.8%) |  |  |
| 70-79 | 595 (39.6%) | 280 (43.5%) |  |  |
| >79 | 217 (14.4%) | 95 (14.8%) |  |  |
| **Sex** |  |  | 1.691 | 0.193 |
| Female | 764 (50.9%) | 348 (54.0%) |  |  |
| Male | 738 (49.1%) | 296 (46.0%) |  |  |
| **Race** |  |  | 1.894 | 0.388 |
| the African Americans | 51 (3.4%) | 17 (2.6%) |  |  |
| Other | 193 (12.8%) | 94 (14.6%) |  |  |
| White | 1258 (83.8%) | 533 (82.8%) |  |  |
| **Marital status** |  |  | 0.154 | 0.695 |
| Married | 974 (64.8%) | 424 (65.8%) |  |  |
| Single | 528 (35.2%) | 220 (34.2%) |  |  |
| **Years of diagnosis** |  |  | 1.00E-03 | 0.971 |
| 1998-2007 | 642 (42.7%) | 274 (42.5%) |  |  |
| 2008-2016 | 860 (57.3%) | 370 (57.5%) |  |  |
| **Tumor site** |  |  | 1.088 | 0.58 |
| Supratentorial | 784 (52.2%) | 331 (51.4%) |  |  |
| Infratentorial | 111 (7.4%) | 41 (6.4%) |  |  |
| Brain, NOS/Other | 607 (40.4%) | 272 (42.2%) |  |  |
| **Pathology Subtypes** |  |  | 2.626 | 0.269 |
| DLBCL | 1223 (81.4%) | 524 (81.4%) |  |  |
| Non-DLBCL | 95 (6.3%) | 31 (4.8%) |  |  |
| Non-Hodgkin lymphoma, NOS | 184 (12.3%) | 89 (13.8%) |  |  |
| **Surgery** |  |  | 0.023 | 0.879 |
| Performed | 611 (40.7%) | 259 (40.2%) |  |  |
| No/unknown | 891 (59.3%) | 385 (59.8%) |  |  |
| **Chemotherapy** |  |  | 0.093 | 0.76 |
| Performed | 1017 (67.7%) | 431 (66.9%) |  |  |
| No/unknown | 485 (32.3%) | 213 (33.1%) |  |  |
| **Radiotherapy** |  |  | 0.983 | 0.321 |
| Performed | 520 (34.6%) | 208 (32.3%) |  |  |
| No/unknown | 982 (65.4%) | 436 (67.7%) |  |  |
| **HIV status** |  |  | <0.001 | 1 |
| Positive | 8 (0.5%) | 4 (0.6%) |  |  |
| Negative/Unknown | 1494 (99.5%) | 640 (99.4%) |  |  |

**Supplement Table 2** Differences in clinical data between the training and validation sets in elderly patients (≥60 years) with primary central nervous system lymphoma.
